# Supplementary material
Source: MDPI journal article supplement (https://www.mdpi.com/2073-4344/12/10/1186)
Supplement: s1 [file s1 › catalysts-1916701-supplementary.pdf]

# Effect of the active metal on the NO<sub>x</sub> formation during catalytic combustion of ammonia SOFC off-gas

Tobias Weissenberger<sup>1\*</sup>, Ralf Zapf<sup>1</sup>, Helmut Pennemann<sup>1</sup> and Gunther Kolb<sup>1</sup>

Fraunhofer Institute for Microengineering and Microsystems IMM, Carl-Zeiss-Straße  
18-20, 55129 Mainz, Germany

\* [tobias.weissenberger@imm.fraunhofer.de](mailto:tobias.weissenberger@imm.fraunhofer.de)

## Supporting Information

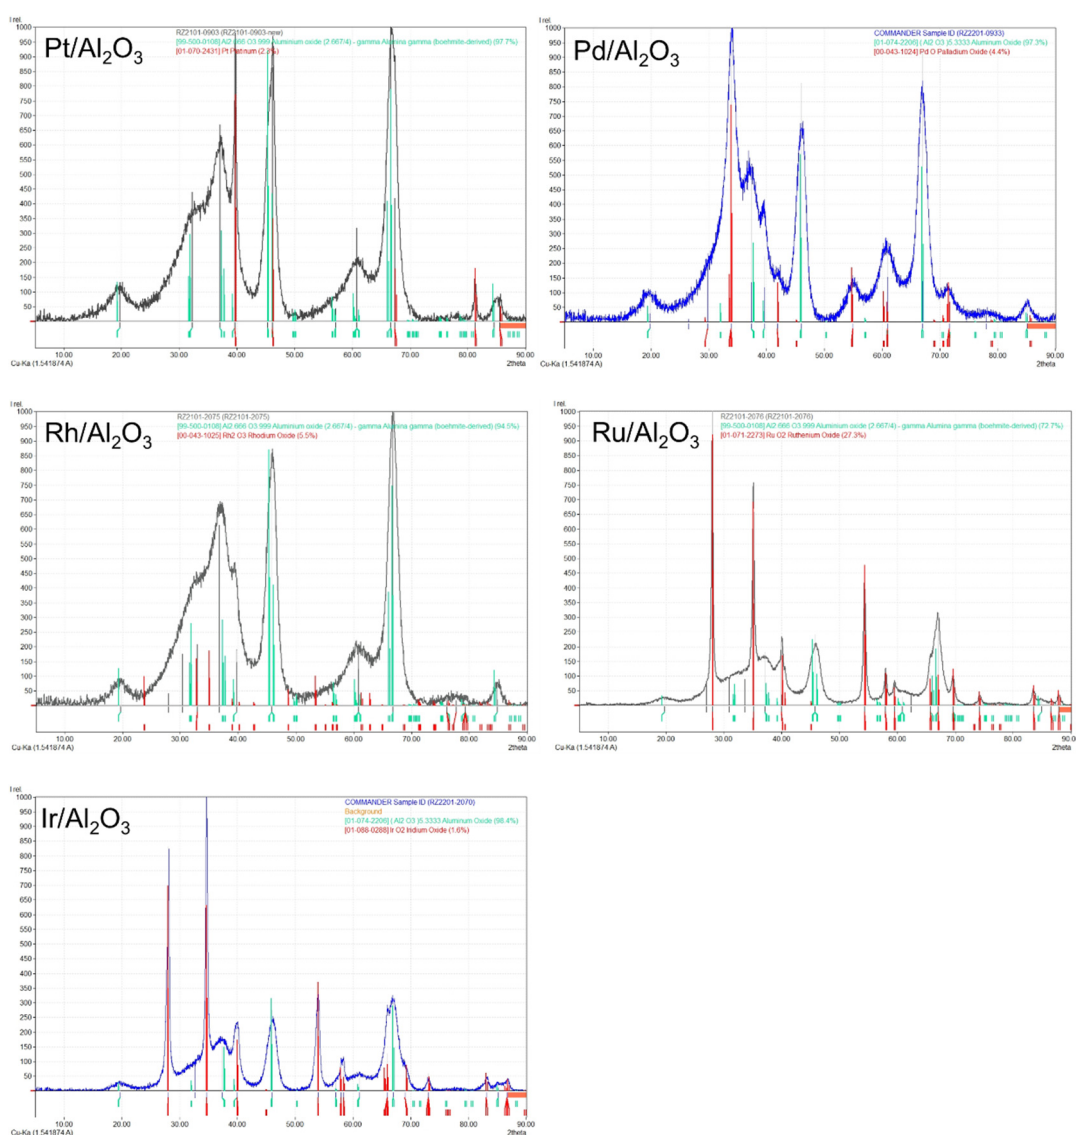

Figure S1: Powder XRD pattern of noble metal based catalysts

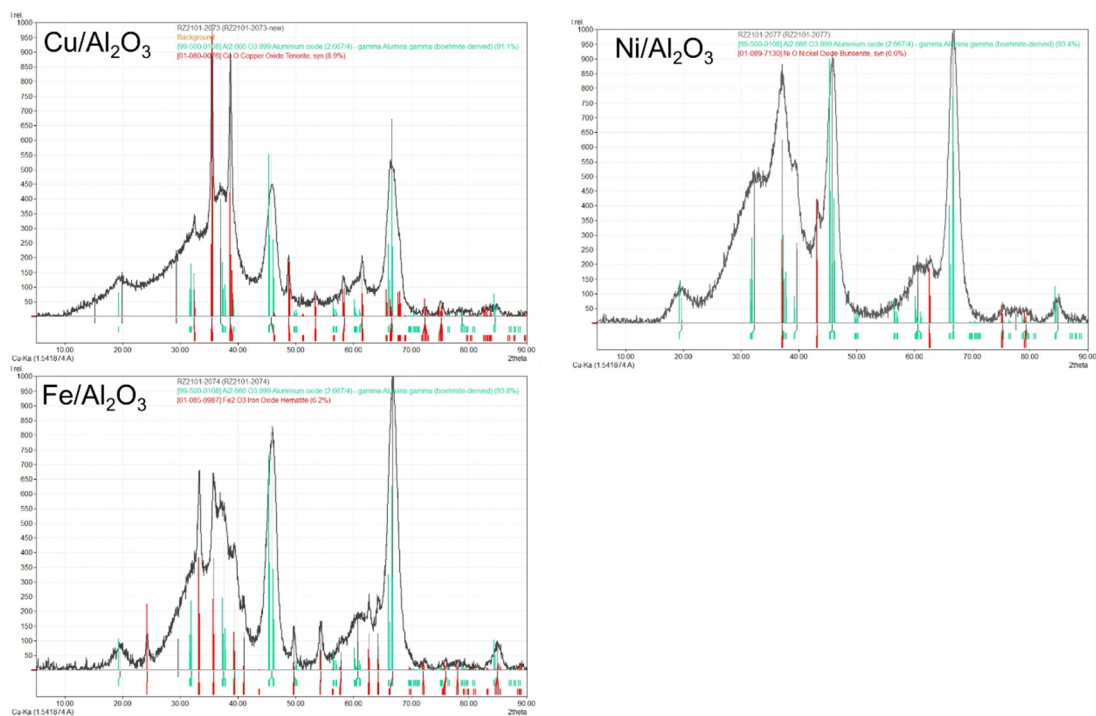

Figure S2: Powder XRD pattern of transition metal based catalysts

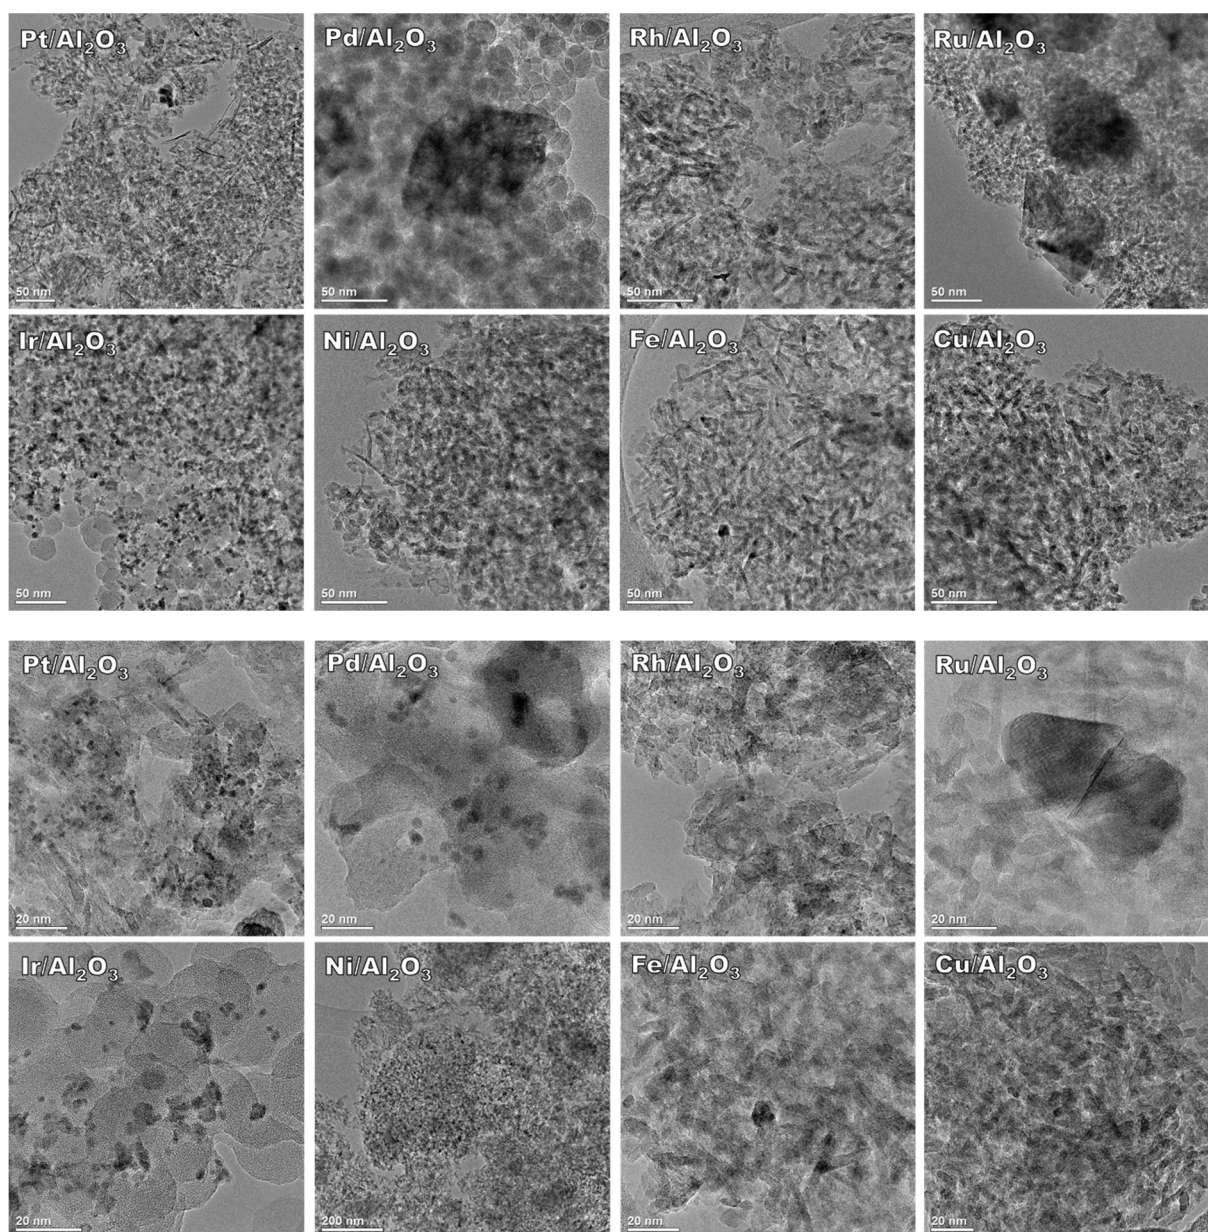

Figure S3: TEM micrographs of the used catalysts with two different magnifications

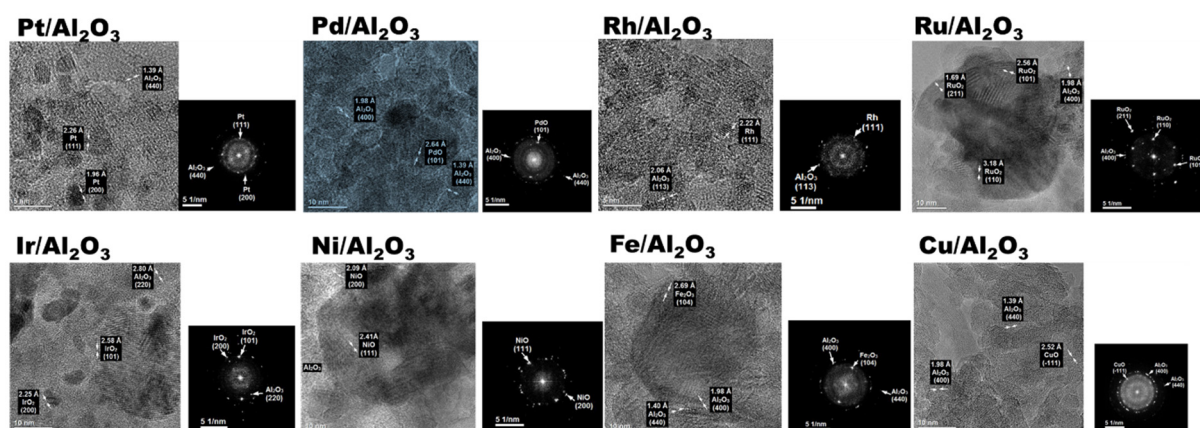

Figure S4: TEM micrographs with interplanar distances and selected area electron beam diffraction images used for identification.

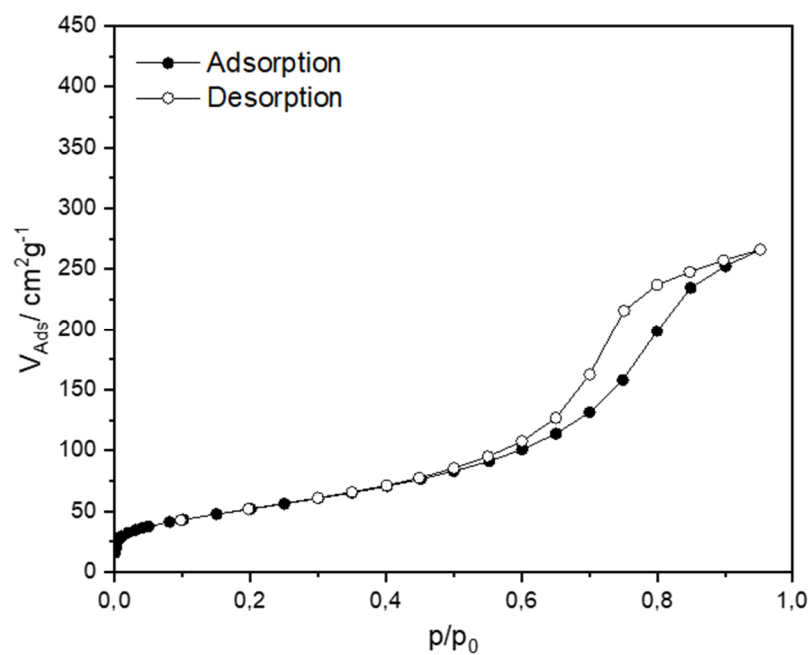

Figure S5: Nitrogen sorption isotherm of  $\text{Al}_2\text{O}_3$  support

*Table S1: Specific surface area (BET method) of the used catalysts*

| Catalyst                            | Surface Area (BET)             |
|-------------------------------------|--------------------------------|
|                                     | m <sup>2</sup> g <sup>-1</sup> |
| Pt/Al <sub>2</sub> O <sub>3</sub>   | 150.2                          |
| Pd/Al <sub>2</sub> O <sub>3</sub>   | 149.8                          |
| Rh/Al <sub>2</sub> O <sub>3</sub>   | 154.1                          |
| Ru/Al <sub>2</sub> O <sub>3</sub>   | 150.7                          |
| Ir/Al <sub>2</sub> O <sub>3</sub>   | 151.6                          |
| Ni/Al <sub>2</sub> O <sub>3</sub>   | 147.5                          |
| Fe/Al <sub>2</sub> O <sub>3</sub>   | 153.6                          |
| Cu/Al <sub>2</sub> O <sub>3</sub>   | 140.8                          |
| pure Al <sub>2</sub> O <sub>3</sub> | 155.9                          |

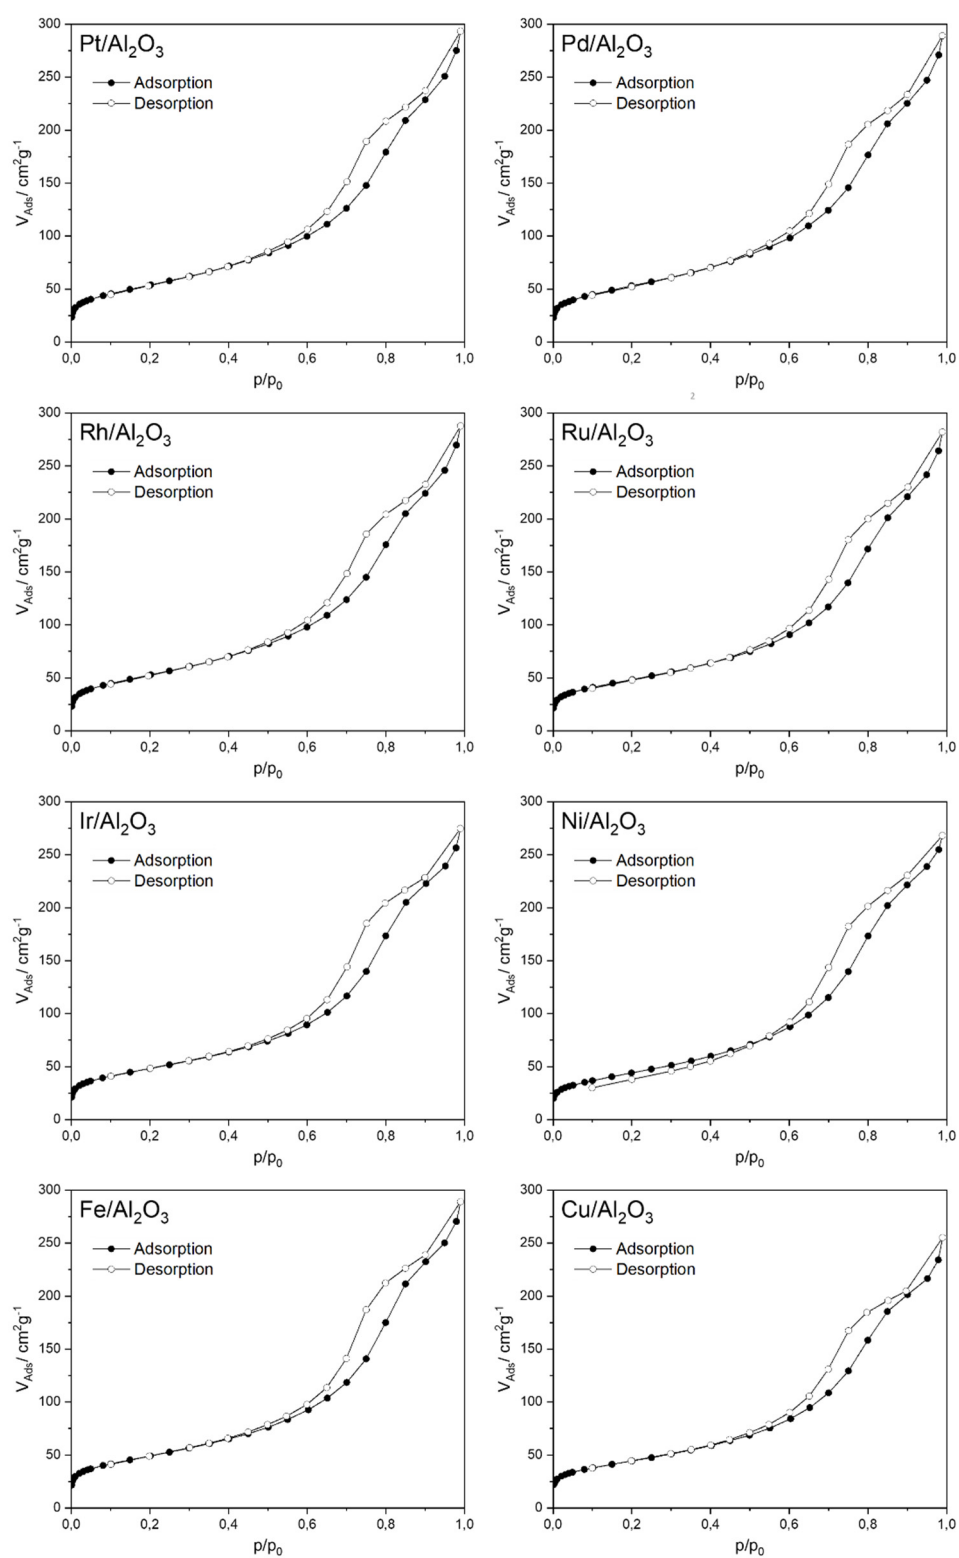

Figure S6: Nitrogen sorption isotherms of the used catalysts

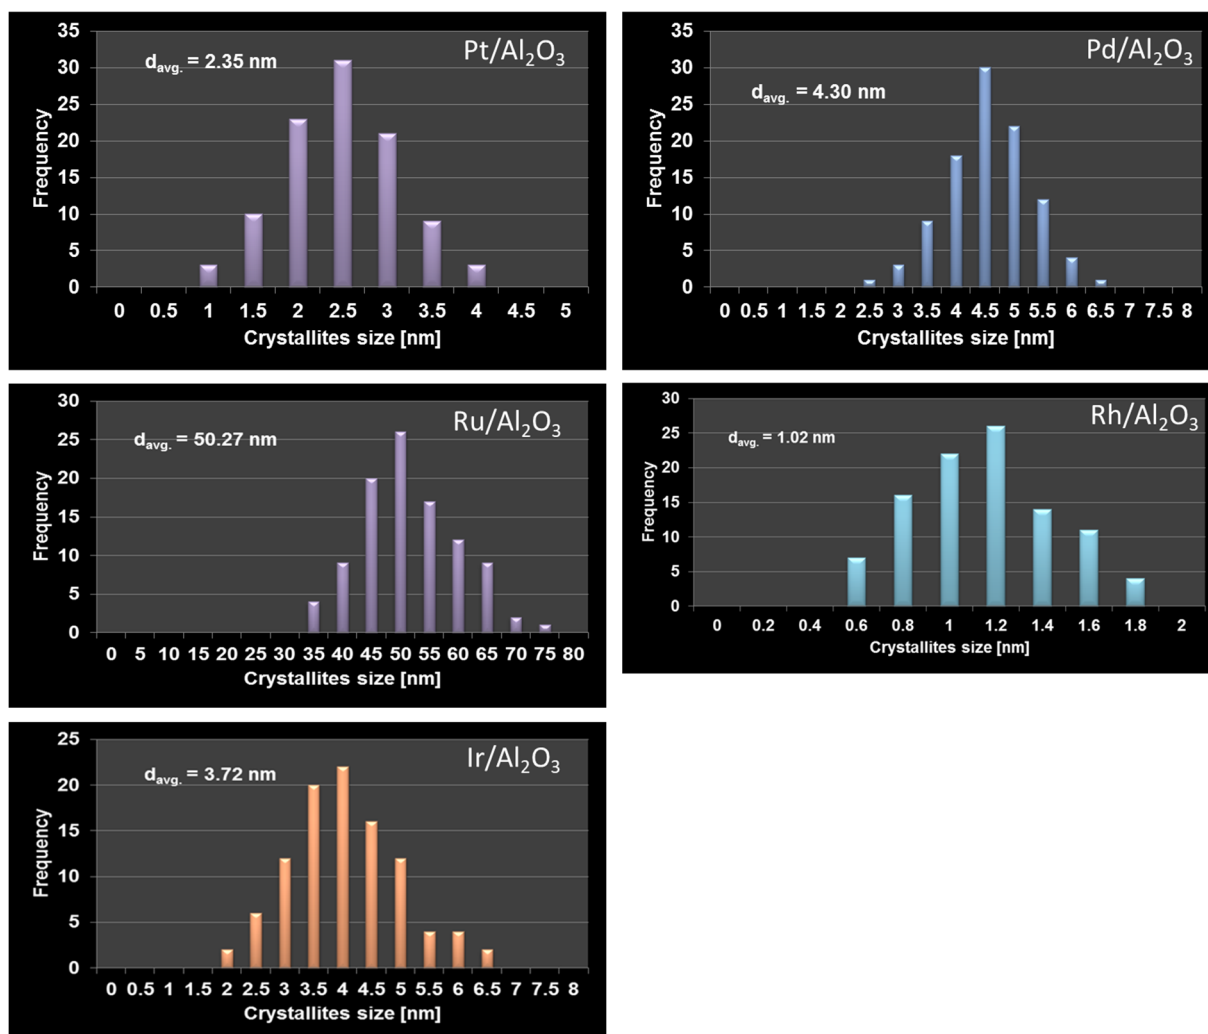

Figure S7: Particle size distribution of different catalysts determined by TEM.
